# Supplementary material for: Estimating prevalence and test accuracy in disease ecology: How Bayesian latent class analysis can boost or bias imperfect test results
Source: PubMed Central journal article supplement (PMC7391344; doi:10.1002/ece3.6448), 2020-06-15
Supplement: ECE3-10-7221-s001.pdf [file ECE3-10-7221-s001.pdf]

**A**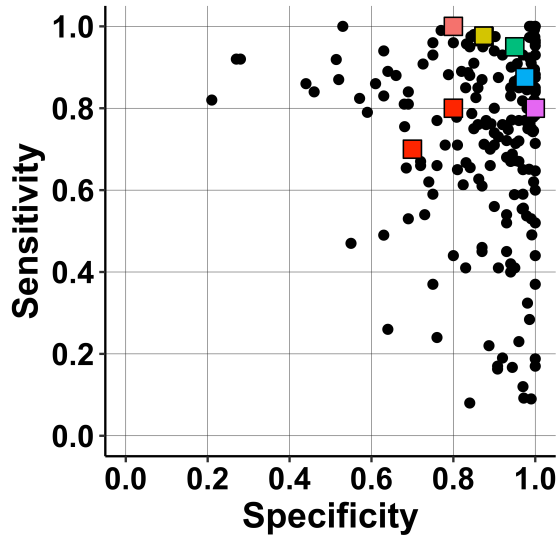

- Test 1
  - Specificity: 70%
  - Sensitivity: 70%
- Test 2
  - Specificity: 80%
  - Sensitivity: 80%

Test 3

| Arc Point | Specificity | Sensitivity |
|-----------|-------------|-------------|
| A         | 0.8         | 1           |
| B         | 0.875       | 0.975       |
| C         | 0.95        | 0.95        |
| D         | 0.975       | 0.875       |
| E         | 1           | 0.8         |

**B**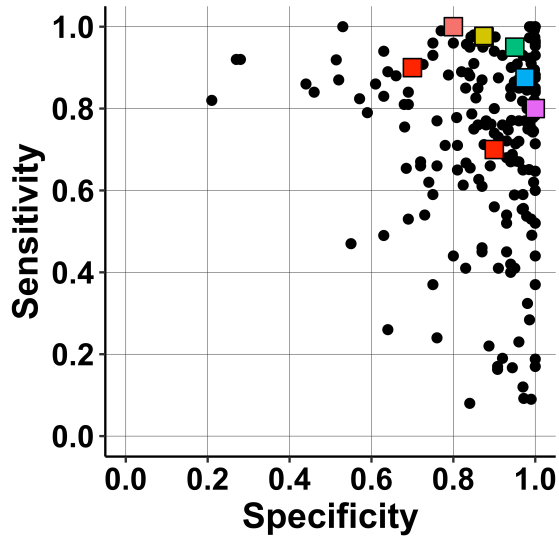

- Test 1
  - Specificity: 70%
  - Sensitivity: 90%
- Test 2
  - Specificity: 90%
  - Sensitivity: 70%

Test 3

- Same as S1A

**C**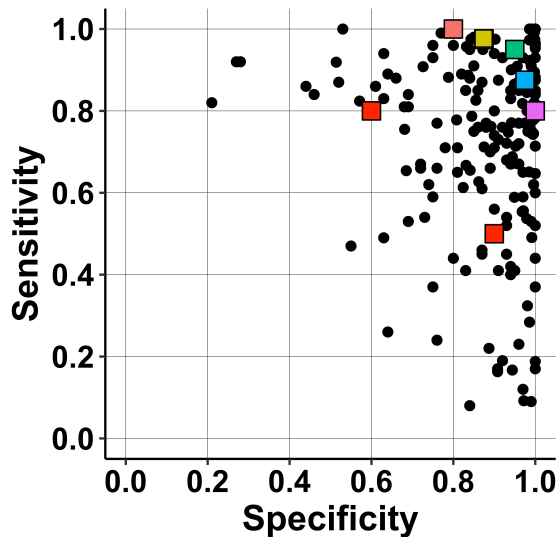

- Test 1
  - Specificity: 60%
  - Sensitivity: 80%
- Test 2
  - Specificity: 90%
  - Sensitivity: 50%

Test 3

- Same as S1A
