# Supplementary material for: Estimating prevalence and test accuracy in disease ecology: How Bayesian latent class analysis can boost or bias imperfect test results
Source: PubMed Central journal article supplement (PMC7391344; doi:10.1002/ece3.6448), 2020-06-15
Supplement: ECE3-10-7221-s002.pdf [file ECE3-10-7221-s002.pdf]

## A. JAGS Model

```

model{
#total<-sum(freqobs[1:8])

#Likelihood
freqobs[1:8]~ dmulti(p[1:8],total)

for (i in 1:8){

p[i]<- prev*(positive[i]) + (1-prev)*(negative[i])

positive[i] <- (Se[1]) * test1[i] + (1-Se[1]) * (1-test1[i]) *
              (Se[2]) * test2[i] + (1-Se[2]) * (1-test2[i]) *
              (Se[3]) * test3[i] + (1-Se[3]) * (1-test3[i])

negative[i] <- ((1-Sp[1]) * test1[i] + Sp[1] * (1-test1[i])) *
              ((1-Sp[2]) * test2[i] + Sp[2] * (1-test2[i])) *
              ((1-Sp[3]) * test3[i] + Sp[3] * (1-test3[i]))

#Priors
prev~dbeta(1,1)
Se[3]~dbeta(1,1)
Sp[3]<- XX

for (j in 1:2){
s[j]~dbeta(1,1)
x[j]~dbeta(1,1)
}
}

```

## B. JAGS Model Explanation

**freqobs**: frequency of observations for each test profile (1:8 refers to profiles a-h)

**Sum(freqobs[1:8])**: total individuals tested

### Likelihood

**p[i]**: probability of each test profile ( $\sum p[i]=1$ )

**positive[i]**: probability that an individual has test profile [i] given the individual is truly positive

**negative[i]**: probability that an individual has test profile [i] given the individual is truly negative

**Tests**: JAGS model input designating test results (0=negative, 1=positive). These test vectors jointly represent all possible test profiles.

**test1** <- c(0,0,1,1,0,0,1,1)

**test2** <- c(0,1,0,1,0,1,0,1)

**test3** <- c(0,0,0,0,1,1,1,1)

### Priors

**Prev**: Prevalence (noninformative)

**Se[3]**: Sensitivity of test 3 (noninformative)

**Sp[3]**: Specificity of test 3 (**fixed value=XX**)

**Se[1:2]**: Sensitivity of test 1 & 2 (noninformative)

**Sp[1:2]**: Specificity of test 1 & 2 (noninformative)

## C. Probability Table

| Test 1 Result | Test 2 Result | Test 3 Result | Total number with this test profile | Expected Total Number for Each Test Profile |                                         |
|---------------|---------------|---------------|-------------------------------------|---------------------------------------------|-----------------------------------------|
|               |               |               |                                     | $n\pi$ : total true positives               | $n(1-\pi)$ : total true negatives       |
| -             | -             | -             | <b>a</b>                            | $n\pi * (1-Se_1)(1-Se_2)(1-Se_3)$           | $+ n(1-\pi) * (Sp_1Sp_2Sp_3)$           |
| -             | +             | -             | <b>b</b>                            | $n\pi * (1-Se_1)Se_2(1-Se_3)$               | $+ n(1-\pi) * Sp_1(1-Sp_2)Sp_3$         |
| +             | -             | -             | <b>c</b>                            | $n\pi * Se_1(1-Se_2)(1-Se_3)$               | $+ n(1-\pi) * (1-Sp_1)Sp_2Sp_3$         |
| +             | +             | -             | <b>d</b>                            | $n\pi * Se_1Se_2(1-Se_3)$                   | $+ n(1-\pi) * (1-Sp_1)(1-Sp_2)Sp_3$     |
| -             | -             | +             | <b>e</b>                            | $n\pi * (1-Se_1)(1-Se_2)Se_3$               | $+ n(1-\pi) * Sp_1Sp_2(1-Sp_3)$         |
| -             | +             | +             | <b>f</b>                            | $n\pi * (1-Se_1)Se_2Se_3$                   | $+ n(1-\pi) * Sp_1(1-Sp_2)(1-Sp_3)$     |
| +             | -             | +             | <b>g</b>                            | $n\pi * Se_1(1-Se_2)Se_3$                   | $+ n(1-\pi) * (1-Sp_1)Sp_2(1-Sp_3)$     |
| +             | +             | +             | <b>h</b>                            | $n\pi * Se_1Se_2Se_3$                       | $+ n(1-\pi) * (1-Sp_1)(1-Sp_2)(1-Sp_3)$ |
