# Supplementary material for: Estimating prevalence and test accuracy in disease ecology: How Bayesian latent class analysis can boost or bias imperfect test results
Source: PubMed Central journal article supplement (PMC7391344; doi:10.1002/ece3.6448), 2020-06-15
Supplement: ECE3-10-7221-s003.pdf [file ECE3-10-7221-s003.pdf]

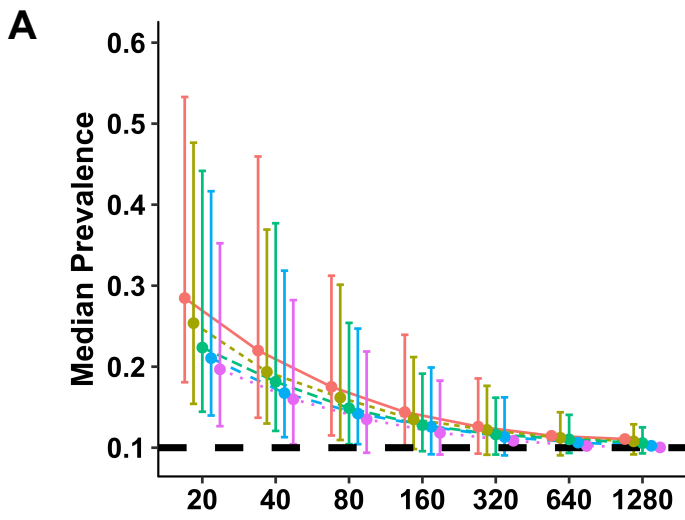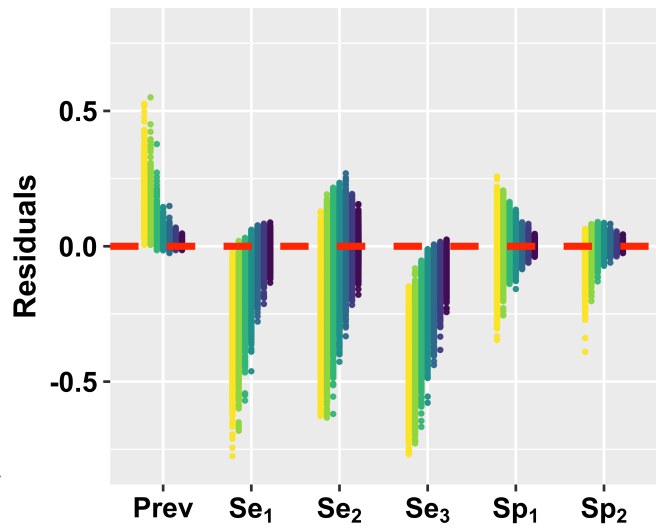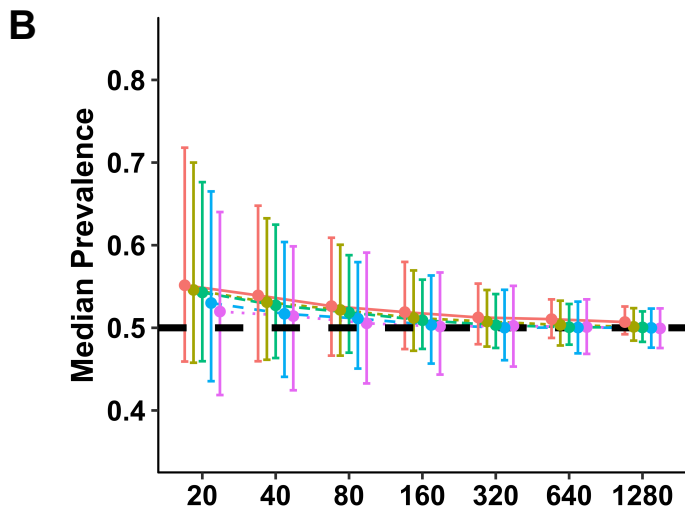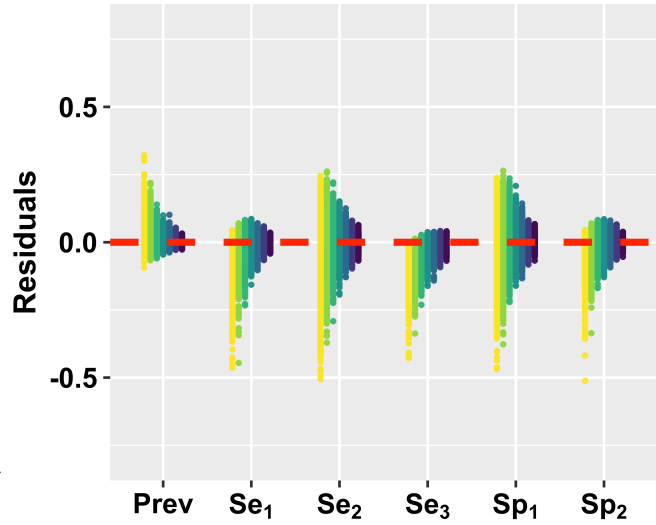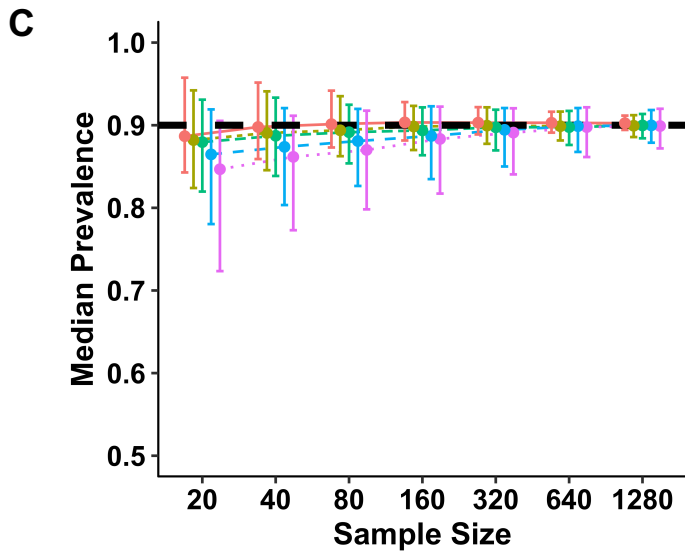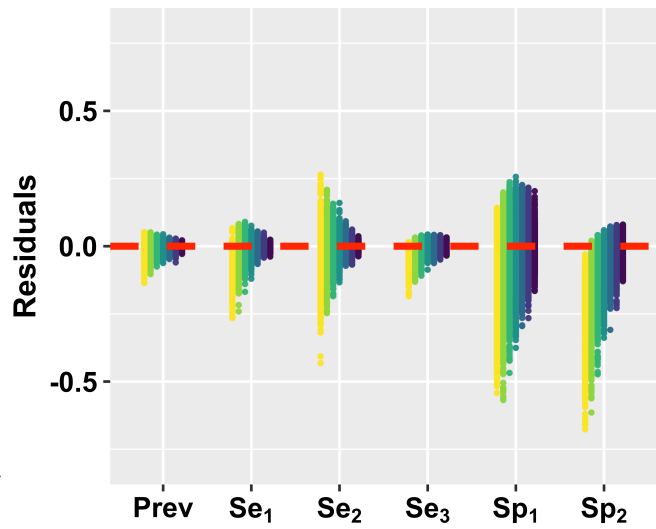

Fixed Arc Point

● A ● B ● C ● D ● E

Sample Size

● 20 ● 40 ● 80 ● 160 ● 320 ● 640 ● 1280
