# Supplementary material for: Estimating prevalence and test accuracy in disease ecology: How Bayesian latent class analysis can boost or bias imperfect test results
Source: PubMed Central journal article supplement (PMC7391344; doi:10.1002/ece3.6448), 2020-06-15

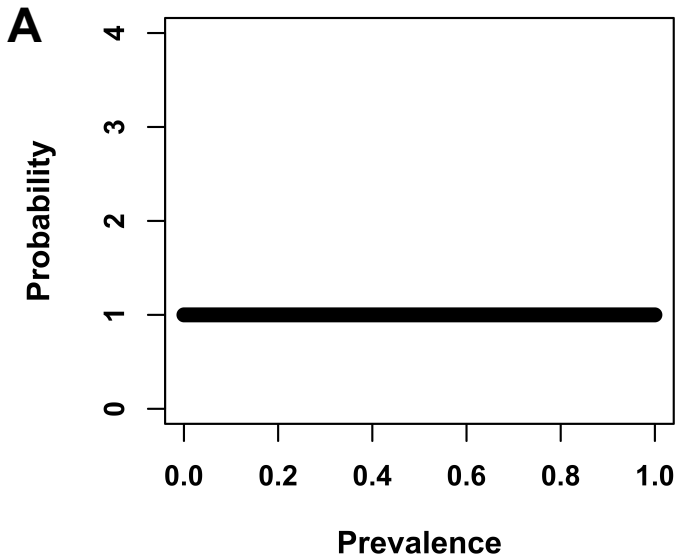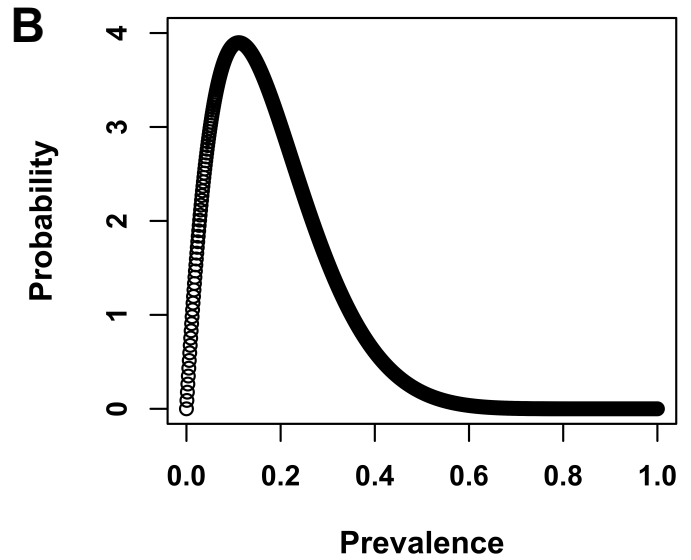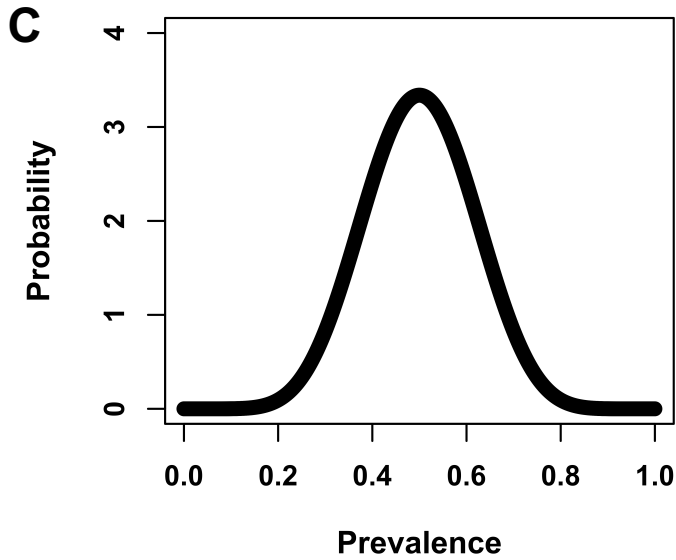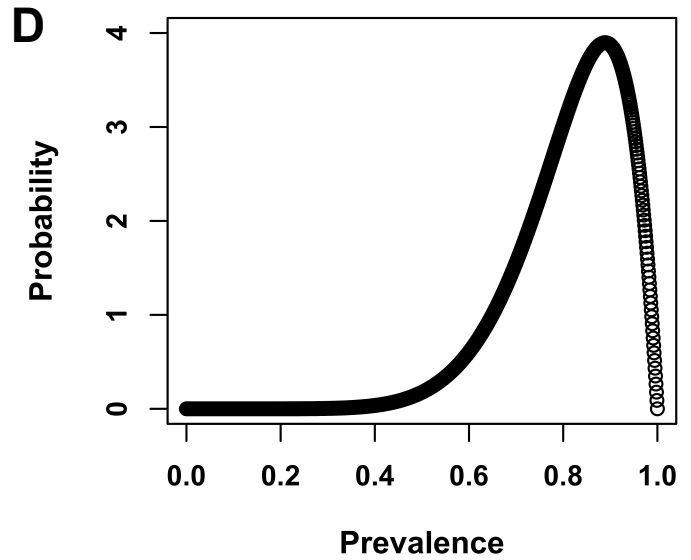

Supplement: ECE3-10-7221-s005.pdf [file ECE3-10-7221-s005.pdf]
