# Supplementary material for: Estimating prevalence and test accuracy in disease ecology: How Bayesian latent class analysis can boost or bias imperfect test results
Source: PubMed Central journal article supplement (PMC7391344; doi:10.1002/ece3.6448), 2020-06-15
Supplement: ECE3-10-7221-s008.pdf [file ECE3-10-7221-s008.pdf]

**Table S1A:** True prevalence = 10%.

| Sample Size | Prevalence<br><i>Point A Test 3:<br/>Sp=0.8/Se=1</i> | Prevalence<br><i>Point B Test 3:<br/>Sp=0.875/Se=0.975</i> | Prevalence<br><i>Point C Test 3:<br/>Sp=0.95/Se=0.95</i> | Prevalence<br><i>Point D Test 3:<br/>Sp=0.975/Se=0.875</i> | Prevalence<br><i>Point E Test 3:<br/>Sp=1/Se=0.8</i> |
|-------------|------------------------------------------------------|------------------------------------------------------------|----------------------------------------------------------|------------------------------------------------------------|------------------------------------------------------|
| n=20        | 0.323 (0.203-0.549)                                  | 0.296 (0.18-0.52)                                          | 0.273 (0.169-0.466)                                      | 0.244 (0.159-0.47)                                         | 0.232 (0.145-0.418)                                  |
| n=40        | 0.269 (0.181-0.479)                                  | 0.243 (0.155-0.486)                                        | 0.218 (0.141-0.44)                                       | 0.207 (0.132-0.408)                                        | 0.194 (0.122-0.363)                                  |
| n=80        | 0.218 (0.143-0.424)                                  | 0.199 (0.125-0.391)                                        | 0.18 (0.121-0.358)                                       | 0.173 (0.113-0.31)                                         | 0.162 (0.105-0.289)                                  |
| n=160       | 0.173 (0.113-0.307)                                  | 0.161 (0.107-0.29)                                         | 0.151 (0.105-0.261)                                      | 0.144 (0.1-0.245)                                          | 0.138 (0.097-0.231)                                  |
| n=320       | 0.145 (0.099-0.259)                                  | 0.14 (0.098-0.235)                                         | 0.131 (0.096-0.215)                                      | 0.125 (0.094-0.202)                                        | 0.121 (0.094-0.191)                                  |
| n=640       | 0.129 (0.093-0.194)                                  | 0.124 (0.096-0.175)                                        | 0.117 (0.096-0.166)                                      | 0.113 (0.092-0.165)                                        | 0.11 (0.09-0.162)                                    |
| n=1280      | 0.118 (0.093-0.157)                                  | 0.115 (0.094-0.152)                                        | 0.112 (0.097-0.148)                                      | 0.108 (0.091-0.144)                                        | 0.103 (0.088-0.137)                                  |

**Table S1B:** True prevalence = 50%.

| Sample Size | Prevalence<br><i>Point A Test 3:<br/>Sp=0.8/Se=1</i> | Prevalence<br><i>Point B Test 3:<br/>Sp=0.875/Se=0.975</i> | Prevalence<br><i>Point C Test 3:<br/>Sp=0.95/Se=0.95</i> | Prevalence<br><i>Point D Test 3:<br/>Sp=0.975/Se=0.875</i> | Prevalence<br><i>Point E Test 3:<br/>Sp=1/Se=0.8</i> |
|-------------|------------------------------------------------------|------------------------------------------------------------|----------------------------------------------------------|------------------------------------------------------------|------------------------------------------------------|
| n=20        | 0.58 (0.462-0.765)                                   | 0.566 (0.46-0.75)                                          | 0.562 (0.475-0.713)                                      | 0.549 (0.438-0.698)                                        | 0.54 (0.419-0.676)                                   |
| n=40        | 0.559 (0.472-0.698)                                  | 0.548 (0.467-0.687)                                        | 0.55 (0.476-0.668)                                       | 0.536 (0.454-0.655)                                        | 0.53 (0.438-0.641)                                   |
| n=80        | 0.547 (0.475-0.647)                                  | 0.541 (0.473-0.633)                                        | 0.536 (0.476-0.615)                                      | 0.525 (0.448-0.617)                                        | 0.518 (0.435-0.615)                                  |
| n=160       | 0.537 (0.482-0.612)                                  | 0.529 (0.478-0.601)                                        | 0.524 (0.478-0.591)                                      | 0.513 (0.451-0.596)                                        | 0.508 (0.434-0.594)                                  |
| n=320       | 0.527 (0.485-0.58)                                   | 0.518 (0.482-0.571)                                        | 0.513 (0.479-0.57)                                       | 0.504 (0.454-0.576)                                        | 0.502 (0.437-0.579)                                  |
| n=640       | 0.519 (0.491-0.556)                                  | 0.512 (0.482-0.551)                                        | 0.506 (0.48-0.548)                                       | 0.501 (0.46-0.556)                                         | 0.498 (0.444-0.558)                                  |
| n=1280      | 0.514 (0.493-0.54)                                   | 0.507 (0.486-0.536)                                        | 0.502 (0.482-0.53)                                       | 0.499 (0.463-0.539)                                        | 0.50 (0.458-0.542)                                   |

**Table S1C:** True prevalence = 90%.

| Sample Size | Prevalence<br><i>Point A Test 3:<br/>Sp=0.8/Se=1</i> | Prevalence<br><i>Point B Test 3:<br/>Sp=0.875/Se=0.975</i> | Prevalence<br><i>Point C Test 3:<br/>Sp=0.95/Se=0.95</i> | Prevalence<br><i>Point D Test 3:<br/>Sp=0.975/Se=0.875</i> | Prevalence<br><i>Point E Test 3:<br/>Sp=1/Se=0.8</i> |
|-------------|------------------------------------------------------|------------------------------------------------------------|----------------------------------------------------------|------------------------------------------------------------|------------------------------------------------------|
| n=20        | 0.889 (0.842-0.956)                                  | 0.882 (0.818-0.943)                                        | 0.882 (0.817-0.931)                                      | 0.867 (0.763-0.92)                                         | 0.846 (0.733-0.904)                                  |
| n=40        | 0.902 (0.858-0.957)                                  | 0.897 (0.849-0.942)                                        | 0.894 (0.84-0.937)                                       | 0.875 (0.803-0.926)                                        | 0.861 (0.765-0.915)                                  |
| n=80        | 0.906 (0.873-0.948)                                  | 0.9 (0.864-0.942)                                          | 0.895 (0.856-0.934)                                      | 0.883 (0.821-0.933)                                        | 0.872 (0.801-0.92)                                   |
| n=160       | 0.909 (0.884-0.937)                                  | 0.901 (0.873-0.931)                                        | 0.896 (0.866-0.928)                                      | 0.887 (0.836-0.927)                                        | 0.879 (0.803-0.925)                                  |
| n=320       | 0.908 (0.891-0.93)                                   | 0.902 (0.878-0.926)                                        | 0.897 (0.869-0.924)                                      | 0.892 (0.84-0.925)                                         | 0.888 (0.824-0.927)                                  |
| n=640       | 0.907 (0.895-0.924)                                  | 0.901 (0.881-0.922)                                        | 0.899 (0.873-0.923)                                      | 0.897 (0.849-0.925)                                        | 0.894 (0.83-0.926)                                   |
| n=1280      | 0.905 (0.896-0.918)                                  | 0.9 (0.882-0.917)                                          | 0.9 (0.874-0.918)                                        | 0.9 (0.864-0.924)                                          | 0.899 (0.847-0.922)                                  |
