# Supplementary material for: Estimating prevalence and test accuracy in disease ecology: How Bayesian latent class analysis can boost or bias imperfect test results
Source: PubMed Central journal article supplement (PMC7391344; doi:10.1002/ece3.6448), 2020-06-15
Supplement: ECE3-10-7221-s011.pdf [file ECE3-10-7221-s011.pdf]

# Estimating prevalence and test accuracy in disease ecology: how Bayesian latent class analysis can boost or bias imperfect test results - *Research Code*

## Single JAGS model run for estimates using California sea lion data:

- 1) Obtain binary test results for PCR, MAT and Serum Chemistry
- 2) Count the frequency of observations (total) and set up initial conditions for jags
- 3) Run the jags model and obtain estimates for prevalence, test sensitivity (s) & test specificity (x)

*Note - Must have the jags file ("Supp\_JAGSModel.txt") in the same folder as this script*

## California Sea Lion BLCA Example

```
#### IMPORT LIBRARIES ####
#library(R2jags)

#Set Working Directory (ensure JAGS file is in this folder)
setwd("~/Desktop/JAGS")

#####
#### California sea lion data example ####
#####

# SET UP BINARY TEST RESULTS
# Dataset was filtered, and binary test results for 3 diagnostic tests are shown below

### COUNT the individuals in each profile (a-h) in your data
#####
# a-h represent all possible test result combinations,
# ranging from all negative (profile a) to all positive (profile h)

#a <- sum(data$MAT==0 & data$SerumChem==0 & data$PCR==0) #212
#b <- sum(data$MAT==0 & data$SerumChem==1 & data$PCR==0) #15
#c <- sum(data$MAT==1 & data$SerumChem==0 & data$PCR==0) #4
#d <- sum(data$MAT==1 & data$SerumChem==1 & data$PCR==0) #0
```

```

#e <- sum(data$MAT==0 & data$SerumChem==0 & data$PCR==1) #10
#f <- sum(data$MAT==0 & data$SerumChem==1 & data$PCR==1) #14
#g <- sum(data$MAT==1 & data$SerumChem==0 & data$PCR==1) #16
#h <- sum(data$MAT==1 & data$SerumChem==1 & data$PCR==1) #22

## SAVE these counts as your frequency of observations
#freqobs <- c(a,b,c,d,e,f,g,h)
freqobs <- c(212, 15, 4, 0, 10, 14, 16, 22)

#####
#####      THREE TEST MODEL ESTIMATE      #####
#####

test1 <- c(0,0,1,1,0,0,1,1) #MAT
test2 <- c(0,1,0,1,0,1,0,1) #Serum chemistry
test3 <- c(0,0,0,0,1,1,1,1) #PCR

total <- sum(freqobs)

##### SET INITIAL CONDITIONS & RUN THE MODEL #####

# Set 3 starting points for the model to run from. Here we use a low (10%), medium (50%)
#and high (90%) prevalence, along with low/med/high sensitivity and specificity values
#NOTE: Here s=sensitivity and x=specificity (rather than 'Se' & 'Sp' in text & Figure S2)
#Test 1 specificity is fixed, and is therefore NA

inits <- list(list(prev=0.5, s=c(0.5, 0.5, 0.5), x=c(0.5,0.5,NA)),
              list(prev=0.9, s=c(0.9, 0.9, 0.9), x=c(0.9,0.9,NA)),
              list(prev=0.1, s=c(0.1, 0.1, 0.1), x=c(0.1,0.1,NA)))

##### Run the model #####
jags.fit <- jags(data=list(test1=test1, test2=test2, test3=test3, freqobs=freqobs,total=total),
                inits=inits, #initial conditions - set above
                parameters.to.save=c("prev", "s", "x"), #prevalence, sensitivity & specificity
                model.file= "Supp_JAGSModel.txt",
                n.chains=length(inits),
                n.iter=10000)

##### CSL MODEL OUTPUT FOR 3 TEST MODEL #####
#Model estimated prevalence, sensitivity (s) and specificity (x) for each test

jags.fit$BUGSoutput$summary #summary table of all values

```

## Simulated Data Generation for Multiple Sample Sizes

```
#####  
##### SIMULATED DATA Based on California sea lion example #####  
#####  
  
## This code simulates diagnostic test results based on the prevalence (20%)  
##and diagnostic test accuracy predicted by BLCA using our California sea lion data (above)  
  
#Set sample sizes you want to test  
pops <- c(20, 40, 80, 160, 320, 640, 1280)  
  
#Set known prevalence and test sensitivities/specificities based on CSL output  
#(obtained in previous chunk using jags.fit$BUGSoutput$summary)  
prev <- 0.2  
sen1 <- 0.65  
sen2 <- 0.61  
sen3 <- 0.96  
spec1 <- 0.98  
spec2 <- 0.93  
spec3 <- 0.972 ##NOTE: In "Supp_JAGSModel.txt", make sure  
#the known specificity for test 3 matches the value here  
  
#Set number of simulated data samples for each sample size  
nsims=1000  
  
#Make a dataframe to store the test results for each simulation  
df_tests_all_sims <- data.frame(matrix(ncol = 9, nrow = nsims))  
  
#####  
##### SIMULATED TEST RESULTS (FREQOBS) #####  
#####  
  
for (yy in 1:7){ #7 is the number of sample sizes you are testing  
  
  #Set the sample size to test  
  pop=pops[yy]  
  
  ###Set up data frames to hold simulated outputs  
  
  #coin flips for test results  
  df <- data.frame(matrix(ncol = 3, nrow = pop))  
  
  #sample size + freq obs (a-h) for each sim  
  df_testresults <- data.frame(matrix(ncol = 9, nrow = nsims))
```

```

#####
##### RUN THE SIMULATION #####
#####

for (ii in 1:nsims){

##### SIMULATED TEST RESULTS FOR INFECTED INDIVIDUALS #####

#Sensitivity: infected individual test results
for (i in 1:(pop*prev)){
  df$X1[i]=rbinom(1,1,sen1)
  df$X2[i]=rbinom(1,1,sen2)
  df$X3[i]=rbinom(1,1,sen3)
}

##### SIMULATED TEST RESULTS FOR UNINFECTED INDIVIDUALS #####

#Specificity: uninfected individual test results
for (i in (prev*pop+1):pop){
  df$X1[i]=rbinom(1,1,(1-spec1))
  df$X2[i]=rbinom(1,1,(1-spec2))
  df$X3[i]=rbinom(1,1,(1-spec3))
}

##### FREQUENCY OF TEST PROFILE OBSERVATIONS #####

#Sum the frequency of test result combos
a <- sum(df$X1==0 & df$X2==0 & df$X3==0)
b <- sum(df$X1==0 & df$X2==1 & df$X3==0)
c <- sum(df$X1==1 & df$X2==0 & df$X3==0)
d <- sum(df$X1==1 & df$X2==1 & df$X3==0)

e <- sum(df$X1==0 & df$X2==0 & df$X3==1)
f <- sum(df$X1==0 & df$X2==1 & df$X3==1)
g <- sum(df$X1==1 & df$X2==0 & df$X3==1)
h <- sum(df$X1==1 & df$X2==1 & df$X3==1)

hh <- c(a,b,c,d,e,f,g,h,i)

#Store sample size and test results (frequency of observations: a-h) in dataframe
df_testresults[ii,]<-c(pop, hh[1], hh[2], hh[3], hh[4], hh[5], hh[6], hh[7], hh[8])
}

#Add the simulation results for each sample size to the previous results
#to produce a dataframe with results for all simulations at all sample sizes
if (yy==1) {
  df_tests_all_sims <- df_testresults
}

```

```

} else {
  df_tests_all_sims <- rbind(df_tests_all_sims, df_testresults)
}

}

#Column names: Sample size and test result profiles (a-h) for each simulation
colnames(df_tests_all_sims) <- c("pop", "000", "010", "100", "110", "001", "010", "101", "111")

```

These simulated test results are the frequency of observation (“freqobs”) data inputs for the JAGS model, which can then estimate the prevalence, sensitivity (tests 1-3) and specificity (tests 1-2) based on the test profiles from each simulation.
